# Supplementary material for: Effect of Microalgal Extracts from Chlorella vulgaris and Scenedesmus quadricauda on Germination of Beta vulgaris Seeds
Source: PubMed Central journal article supplement (PMC7355607; doi:10.3390/plants9060675), 2020-05-26
Supplement: plants-09-00675-s001.pdf [file plants-09-00675-s001.pdf]

## Supplementary Files

**Supplementary Table 1.** Distribution of C intensity of  $^{13}\text{C}$  NMR (%) of *Chlorella vulgaris* (CVextr) and *Scenedesmus quadricauda* (SQextr) extracts (Barone et al., 2018).

|        | Alkyl<br>0-45<br>ppm | N and O alkyl 45-95<br>ppm | Aromatic 95-160<br>ppm | Carboxyl 160-195<br>ppm | HB/HI <sup>1</sup> |
|--------|----------------------|----------------------------|------------------------|-------------------------|--------------------|
| CVextr | 63.39                | 4.75                       | 22.5                   | 9.37                    | 6.1                |
| SQextr | 55.23                | 16.25                      | 24.09                  | 4.42                    | 3.8                |

<sup>1</sup>Hydrophobicity index was calculated as follows:  $\text{HB/HI} = [(0 - 45) + (95 - 160)] / [(45 - 95) + (160 - 195)]$ .

**Supplementary Table 2.** Element composition (%) of *Chlorella vulgaris* (CVextr) and *Scenedesmus quadricauda* (SQextr) extracts (Barone et al., 2018).

|        | C    | N    | P    | S    | Mg   | Ca   | Fe   | K    | Na   |
|--------|------|------|------|------|------|------|------|------|------|
| CVextr | 62.2 | 1.37 | 0.24 | 0.37 | 0.51 | 0.05 | 0.01 | 0.52 | 3.87 |
| SQextr | 62.8 | 1.17 | 0.36 | 0.41 | 0.53 | 0.15 | 0.01 | 0.35 | 2.42 |
